# Supplementary material
Source: Springer Nature journal article supplement (https://www.springermedizin.de/resource/supplementary/13063_2013_1937_MOESM1_ESM.pdf/9622002)

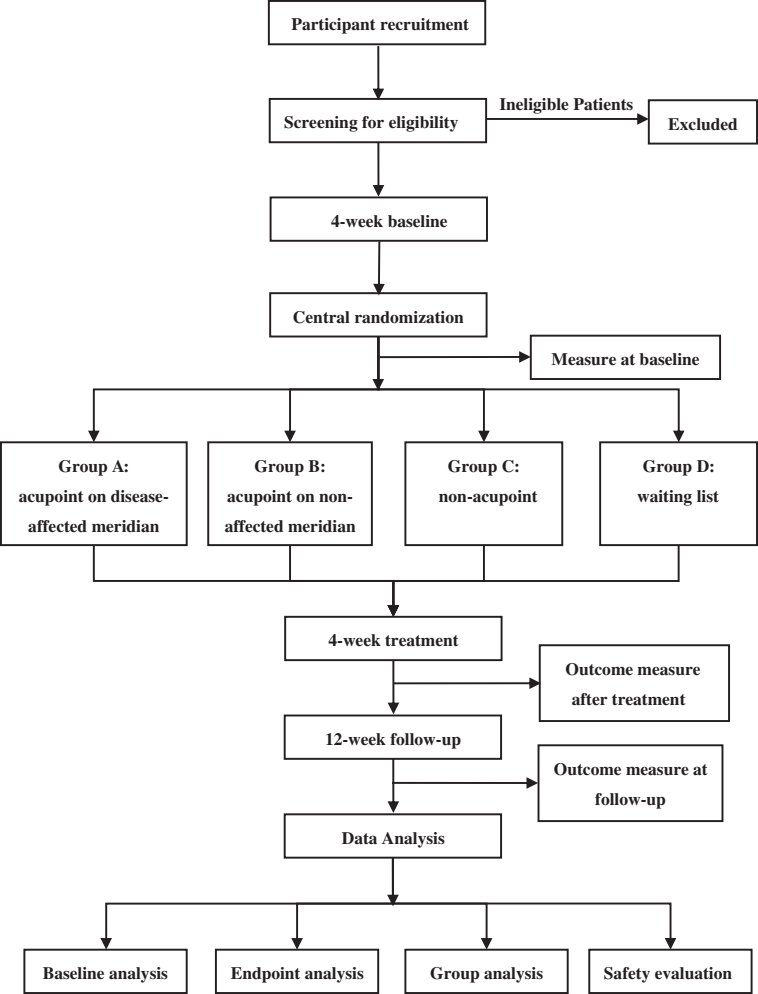

Supplement: MOESM1 [file 9622002]
